# Supplementary material for: Construction and excellent photoelectric synergistic anticorrosion performance of Z-scheme carbon nitride/tungsten oxide heterojunctions
Source: Royal Society of Chemistry journal article supplement (doi:10.1039/d2nr03246e), 2022-01-01
Supplement: d2nr03246e1.pdf [file d2nr03246e1.pdf]

## Construction and Excellent Photoelectric Synergistic Anticorrosion Performance of Z-Scheme Carbon Nitride/Tungsten Oxide Heterojunctions

*Yunxiao Ge, Xiaojiao Guo, Dan Zhou, and Jinku Liu\**

Key Laboratory for Advanced Materials, School of Chemistry and Molecular Engineering, East China  
University of Science and Technology (ECUST), Shanghai, 200237, P.R. China

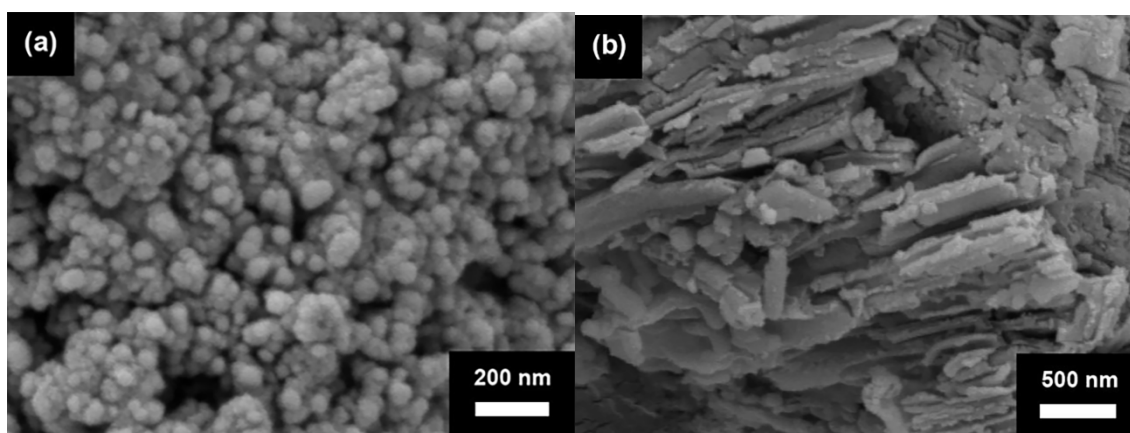

**Figure S1.** SEM images of (a) WO<sub>3</sub>, (b) g-C<sub>3</sub>N<sub>4</sub>.

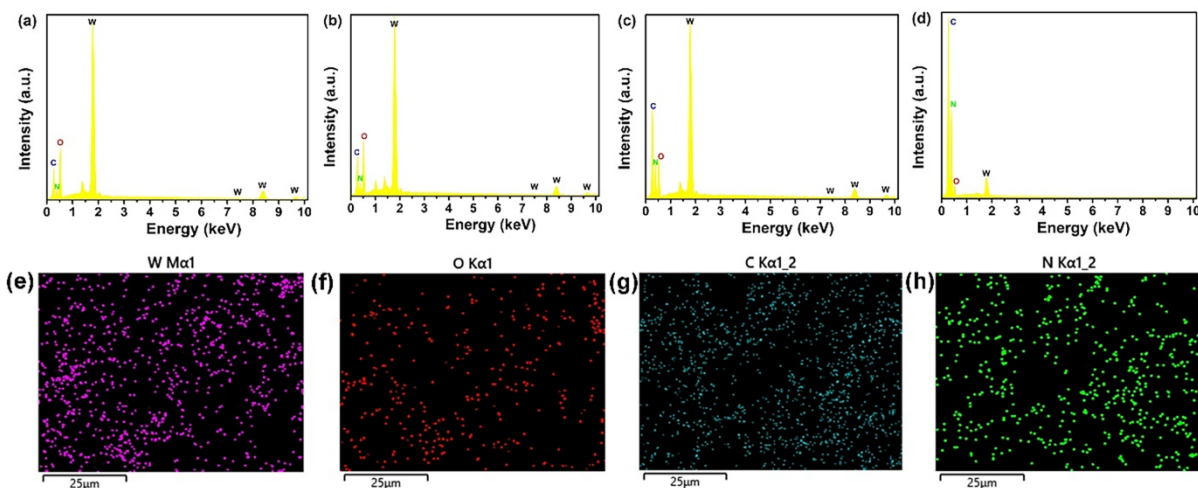

**Figure S2.** EDS patterns of (a) 15CN/WO, (b) 30CN/WO, (c) 60CN/WO and (d) 90CN/WO. EDS mapping images of 60CN/WO: (e) W, (f) O, (g) C and (h) N.

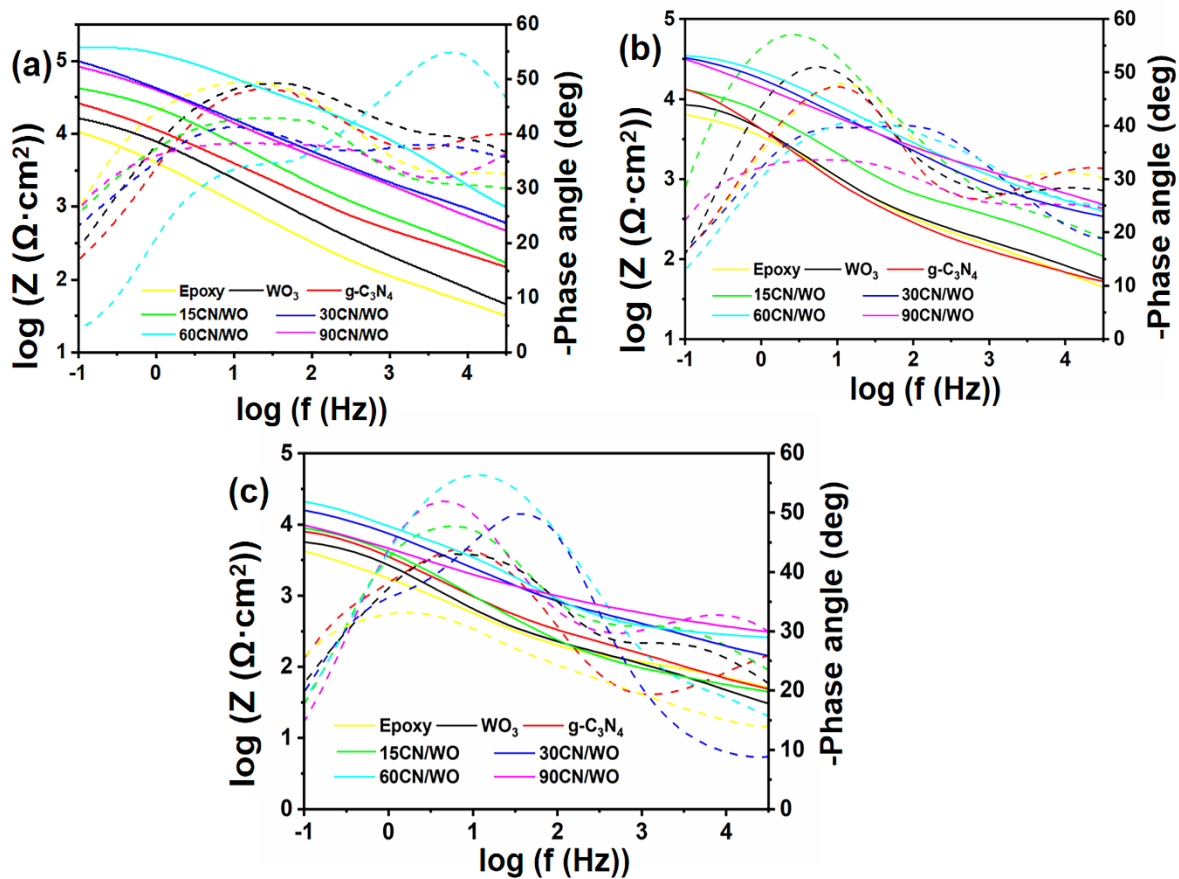

**Figure S3.** Bode curves (where the full line represents  $\log(Z(\Omega \cdot \text{cm}^2))$  and the dotted line represents  $-\text{Phase angle (deg)}$ ) of iron matrix covering epoxy resin system immersed in salt water for different time: (a) 6 h, (b) 24 h, (c) 48 h.

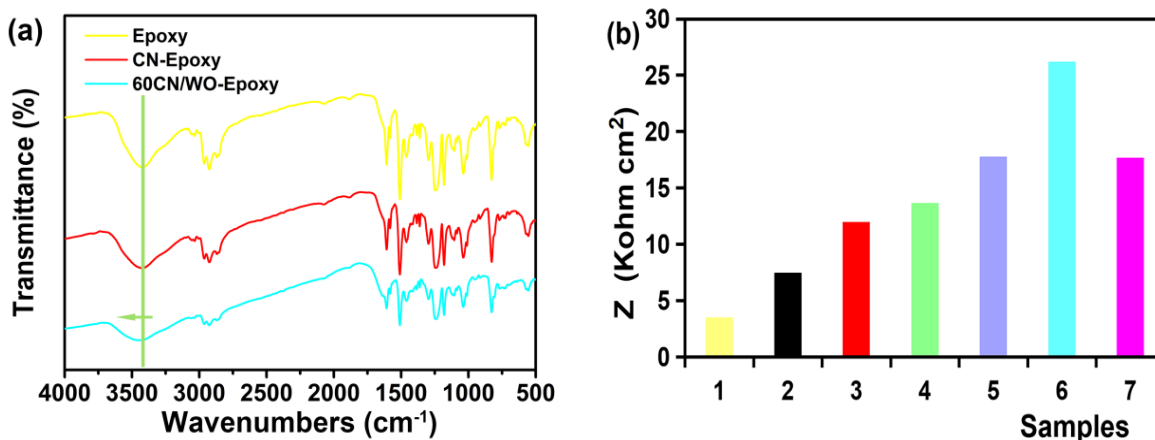

**Figure S4.** FT-IR spectra (a) of various epoxy resin systems. Histograms (b) of impedance values of all coatings after soaking in sodium chloride solution for 72 h: (1) Epoxy, (2) WO<sub>3</sub>, (3) g-C<sub>3</sub>N<sub>4</sub>, (4) 15CN/WO, (5) 30CN/WO, (6) 60CN/WO and (7) 90CN/WO.

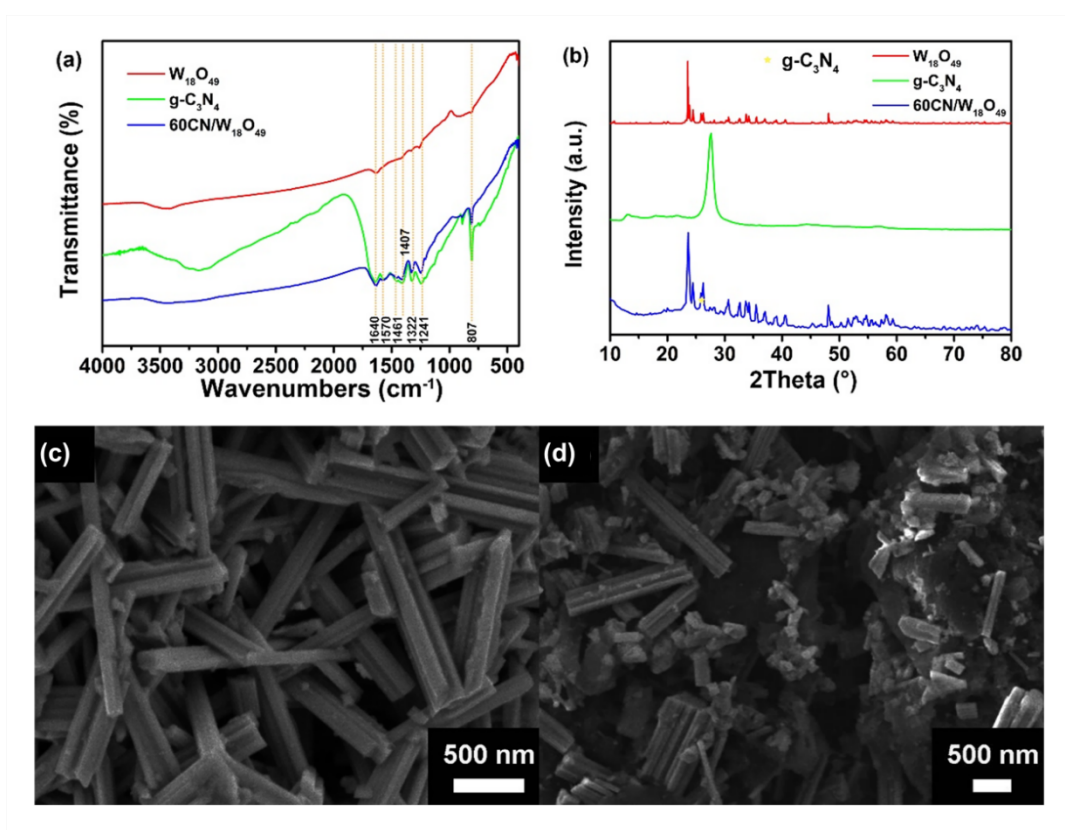

**Figure S5.** FT-IR spectra (a). XRD patterns (b) of W<sub>18</sub>O<sub>49</sub>, g-C<sub>3</sub>N<sub>4</sub> and 60CN/W<sub>18</sub>O<sub>49</sub> samples. SEM images of (c) W<sub>18</sub>O<sub>49</sub>, (d) 60CN/W<sub>18</sub>O<sub>49</sub> pigments.

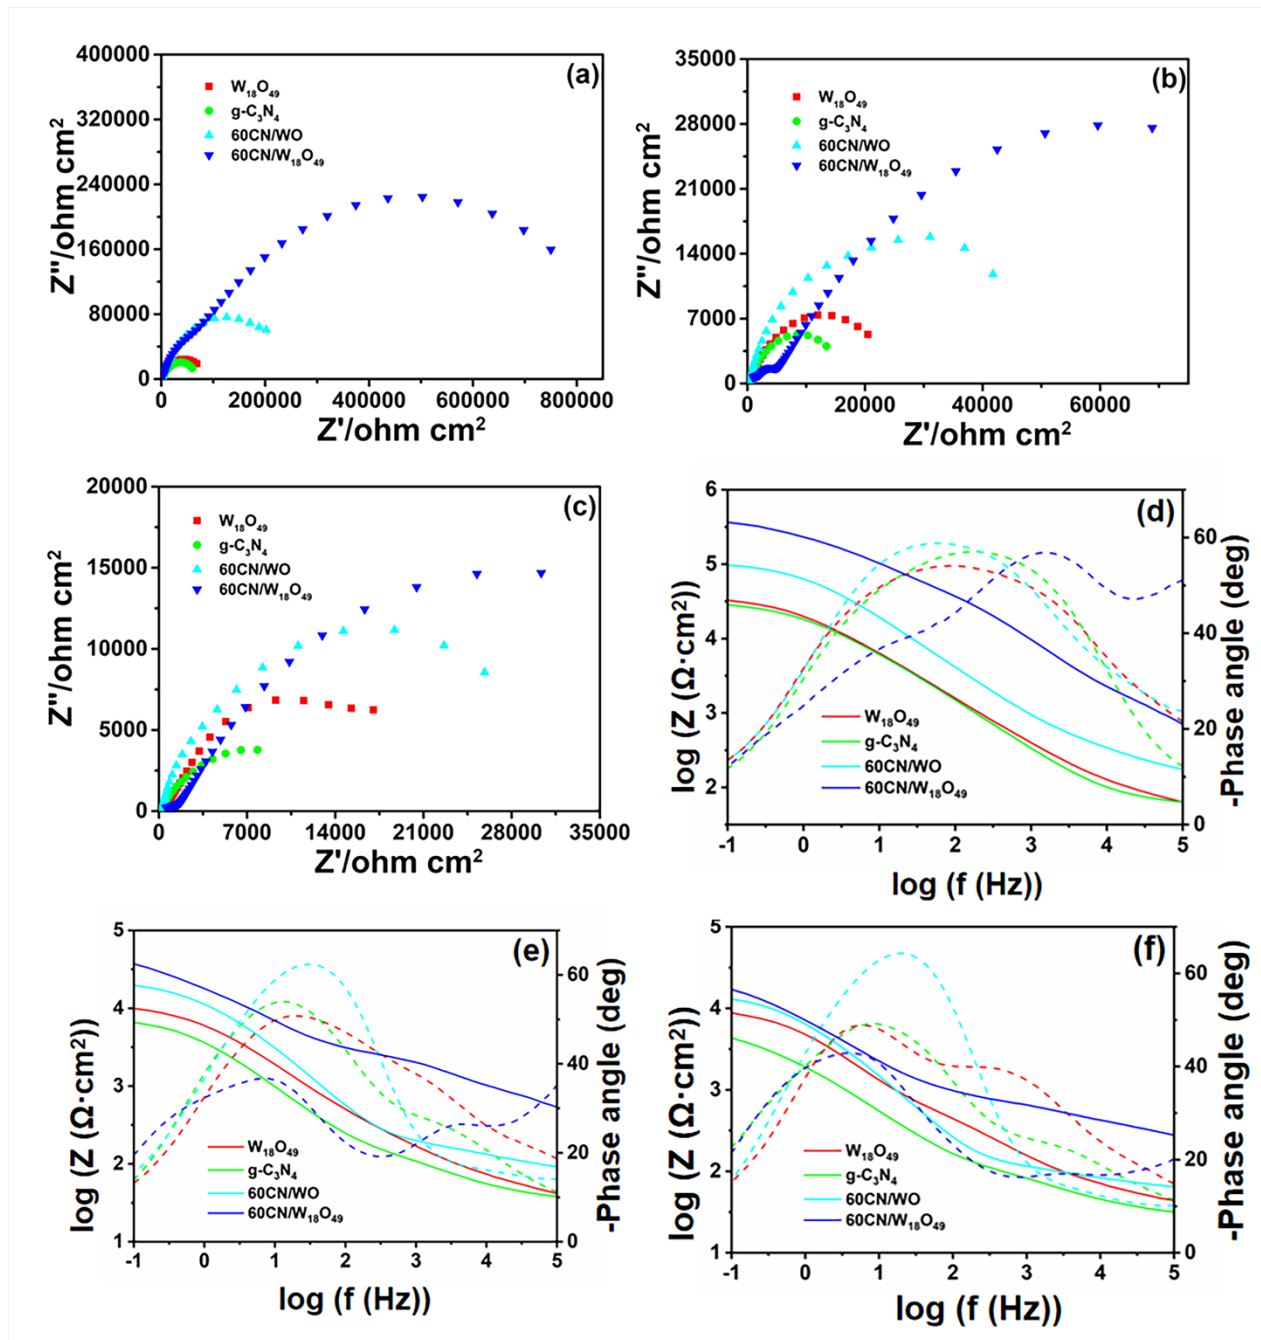

**Figure S6.** Nyquist plots of coatings after immersion in NaCl model for different times: (a) 5 h, (b) 24 h, (c) 48 h. Bode plots (where the full line represents  $\log(Z(\Omega \cdot \text{cm}^2))$ ) and the dotted line represents -Phase angle (deg) of different coatings after corrosion for different times: (a) 5 h, (b) 24 h, (c) 48 h.

**Table S1.** The chemical composition of iron substrate.

| Elements | Fe    | C    | Si   | Mn   | P    | S    | Cu   | others |
|----------|-------|------|------|------|------|------|------|--------|
| Wt.%     | 98.00 | 0.20 | 0.30 | 0.50 | 0.06 | 0.04 | 0.30 | 0.60   |

**Table S2.** The Zeta value of CN/WO heterojunctions.

| Sample              | 15CN/WO | 30CN/WO | 60CN/WO | 90CN/WO |
|---------------------|---------|---------|---------|---------|
| Zeta potential (mV) | -46.55  | -38.95  | -19.36  | -28.44  |

**Table S3.** Polar and dispersive forces of pure epoxy resin and 60CN/WO heterojunction coatings.

| Sample  | Polar force (kJ·mol <sup>-1</sup> ) | Dispersion force (kJ·mol <sup>-1</sup> ) |
|---------|-------------------------------------|------------------------------------------|
| Epoxy   | 32.99                               | 2.40                                     |
| 60CN/WO | 19.16                               | 3.67                                     |

**Table S4.** EIS parameters with W<sub>18</sub>O<sub>49</sub>, g-C<sub>3</sub>N<sub>4</sub>, 60CN/WO and 60CN/W<sub>18</sub>O<sub>49</sub> coatings after immersion in NaCl solution for 72 h.

| Sample                                                     | W <sub>18</sub> O <sub>49</sub> | g-C <sub>3</sub> N <sub>4</sub> | 60CN/WO              | 60CN/W <sub>18</sub> O <sub>49</sub> |
|------------------------------------------------------------|---------------------------------|---------------------------------|----------------------|--------------------------------------|
| Model                                                      | R(QR)(QR)(CR)                   |                                 |                      |                                      |
| $R_s/\text{ohm}\cdot\text{cm}^2$                           | 61.26                           | 41.86                           | 122.40               | 189.80                               |
| $Y_1/\text{ohm}^{-1}\cdot\text{cm}^{-2}\cdot\text{s}^{-n}$ | $8.15\times 10^{-5}$            | $7.76\times 10^{-5}$            | $2.33\times 10^{-5}$ | $2.50\times 10^{-5}$                 |
| $n_1$                                                      | 0.46                            | 0.69                            | 0.84                 | 0.69                                 |
| $R_c/\text{ohm}\cdot\text{cm}^2$                           | 133.10                          | 6842.00                         | $2.61\times 10^4$    | $3.61\times 10^4$                    |
| $Y_2/\text{ohm}^{-1}\cdot\text{cm}^{-2}\cdot\text{s}^{-n}$ | $6.52\times 10^{-5}$            | $1.00\times 10^{-5}$            | $5.26\times 10^{-5}$ | $1.25\times 10^{-5}$                 |
| $n_2$                                                      | 0.77                            | 0.52                            | 0.49                 | 0.60                                 |
| $R_{ct}/\text{ohm}\cdot\text{cm}^2$                        | $1.20\times 10^4$               | 72.06                           | 438.90               | 249.80                               |
| $C_f/\text{F}\cdot\text{cm}^{-2}$                          | $4.92\times 10^{-5}$            | $9.66\times 10^{-4}$            | $4.00\times 10^{-5}$ | $1.10\times 10^{-5}$                 |
| $R_f/\text{ohm}\cdot\text{cm}^2$                           | 1707.00                         | 2304.00                         | 1658.00              | 368.90                               |
| Chi-Squared                                                | $3.97\times 10^{-4}$            | $9.06\times 10^{-5}$            | $2.45\times 10^{-4}$ | $1.21\times 10^{-4}$                 |
| $Z/\text{ohm}\cdot\text{cm}^2$                             | $9.58\times 10^3$               | $6.01\times 10^3$               | $2.06\times 10^4$    | $2.26\times 10^4$                    |
